# Supplementary material for: Functional Genomics and Phylogenetic Evidence Suggest Genus-Wide Cobalamin Production by the Globally Distributed Marine Nitrogen Fixer Trichodesmium
Source: PubMed Central journal article supplement (PMC5816740; doi:10.3389/fmicb.2018.00189), 2018-02-13
Supplement: DataSheet1.pdf [file DataSheet1.pdf]

## **Supplementary Information**

### *Particulate B-vitamin analyses*

Briefly, the cells on the filters were lysed by bead beating in an acidic methanol lysis solution followed by a chloroform liquid phase extraction to reduce signal suppression and negative matrix effects. Analysis of samples was conducted using a Thermo Scientific Quantum Access electrospray ionization triple quadrupole mass spectrometer, coupled to a Thermo Scientific Accela High Speed Liquid Chromatography (LC/MS) system. The LC system used a stable-bond C<sub>18</sub> reversed-phase column (Discovery HS C<sub>18</sub> 10cm × 2.1mm, 5µm column, Supelco Analytical), with a methanol:water gradient program (Sanudo-Wilhelmy et al., 2012). Triple injections of each sample were used to increase precision. Quantification was conducted using a stable isotopically labeled riboflavin as an internal standard. Total cobalamin was calculated by summing the mean observed concentrations of adenosyl-, methyl-, hydroxy-, and cyano-cobalamin. The reported standard deviation is the square root of the sum of the variances of each form of cobalamin (Fig. S1). The units used are picomolar (e.g., picomoles of particulate cobalamin per liter of culture).

### *Consortia RNA read processing and annotation*

Reads not recruited to IMS101's reference genome were scanned with SortMeRNA v.2.0 with default settings in order to identify and remove any remaining ribosomal RNA reads (Kopylova et al., 2012). Samples were then concatenated together and co-assembled with Trinity v.2.4.0 with default settings (which included normalization in this version) (Haas et al., 2013). Coding sequences were then identified in these assembled transcripts via Prodigal v.2.6.2 with the `-p` flag set to 'meta' (Hyatt et al., 2012). Duplicate coding sequences and contaminants were removed with `dedupe.sh`, available within the BBMap suite of tools (Bushnell, B. [sourceforge.net/projects/bbmap/](https://sourceforge.net/projects/bbmap/)). These remaining coding sequences were utilized as our

reference library for recruiting the original metatranscriptomic reads from each individual sample using Bowtie2, and read counts were then converted to transcripts per million by first normalizing to coding sequence length and then by sample library size. Amino acid sequences of coding sequences were annotated with Kyoto Encyclopedia of Genes and Genomes (KEGG) orthologs (KOs) (Kanehisa et al., 2016). B<sub>12</sub>-related genes discussed herein were searched against NCBI's RefSeq protein database via BLASTp to identify taxonomy (evalue < 10<sup>-20</sup>).

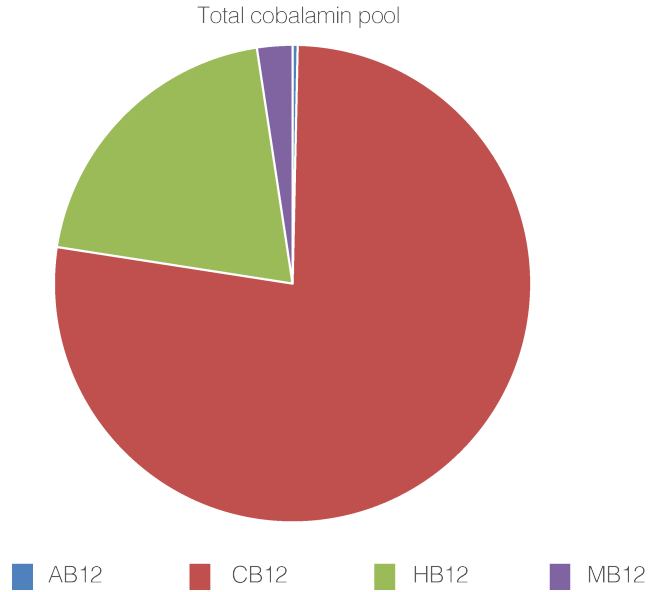

Fig. S1 Distribution of different forms of cobalamin making up the total pool from cultures of *Trichodesmium* IMS101. Cobalamin was extracted from filtered culture samples, and analyzed using LC/MS. The total cobalamin pool is represented including adenosyl- (AB), methyl- (MB), hydroxy- (HB), and cyano- (CB) cobalamin pools and had a mean of 58.4 (+/- 27.1) pM (e.g., picomoles of particulate cobalamin per liter of culture).

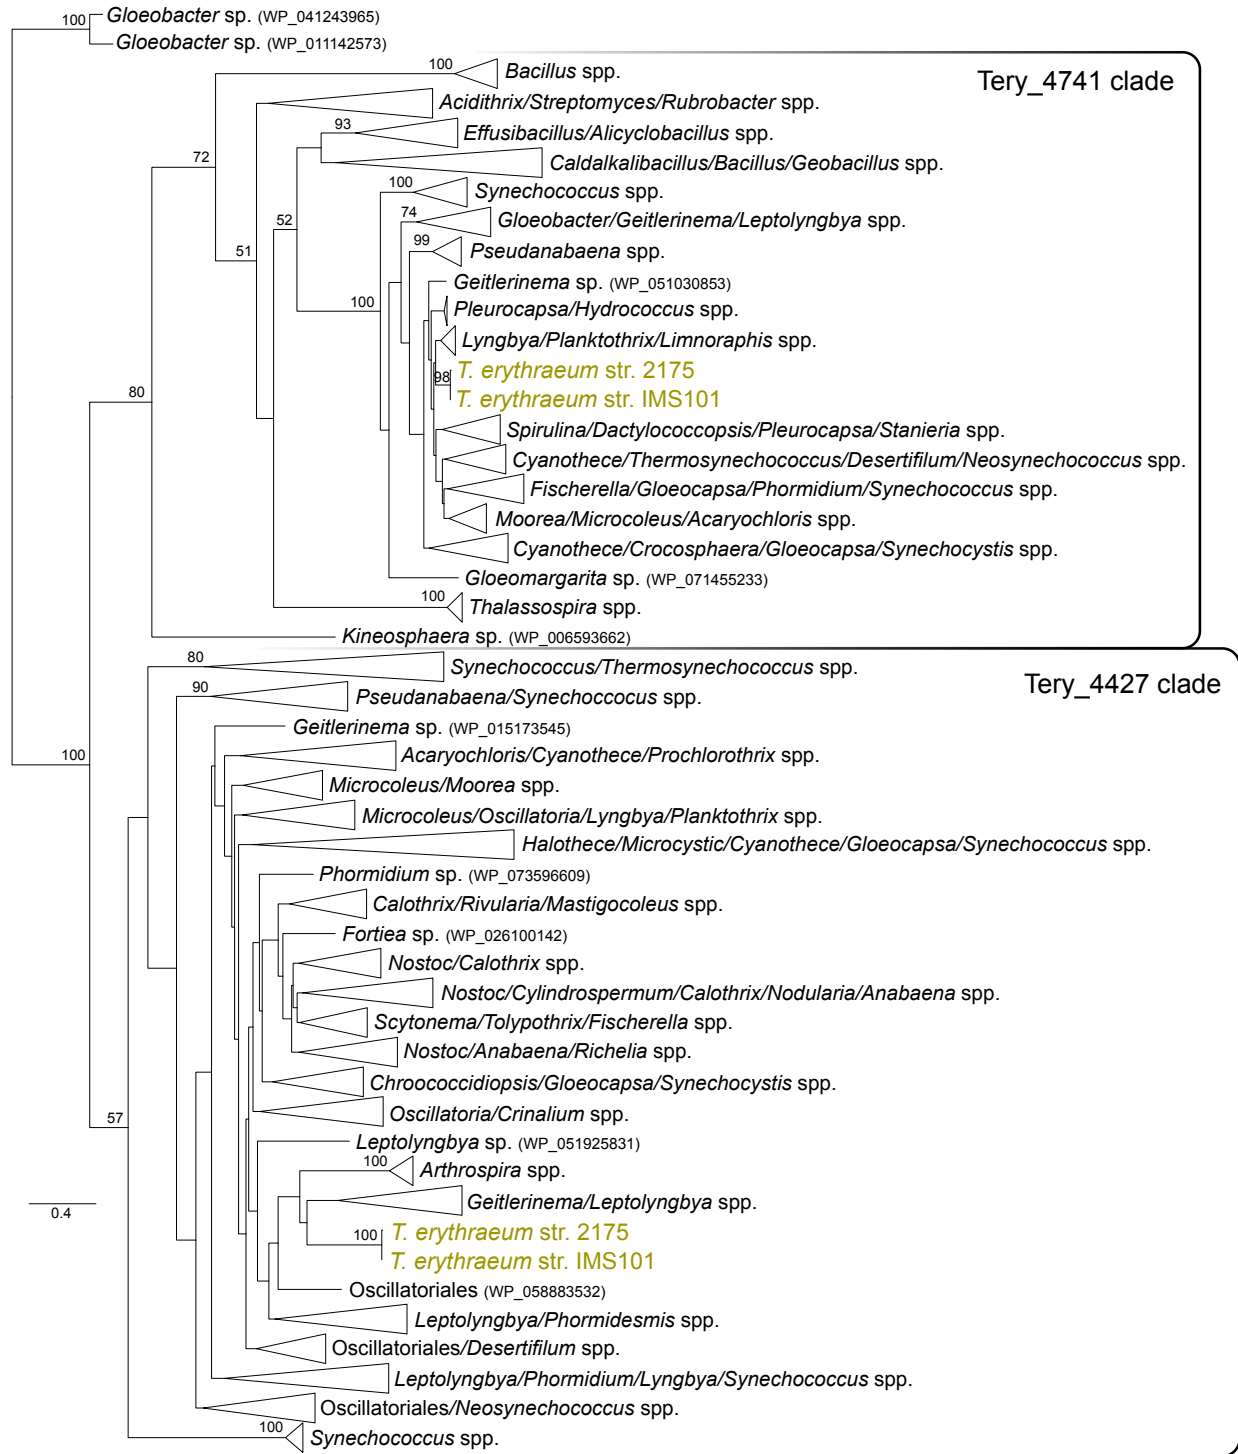

Fig. S2 Maximum likelihood phylogenetic analysis of IMS101 and 2175 *cbiX* genes (Tery\_4741 and Tery\_4427) and their closest homologs with 100 bootstraps.

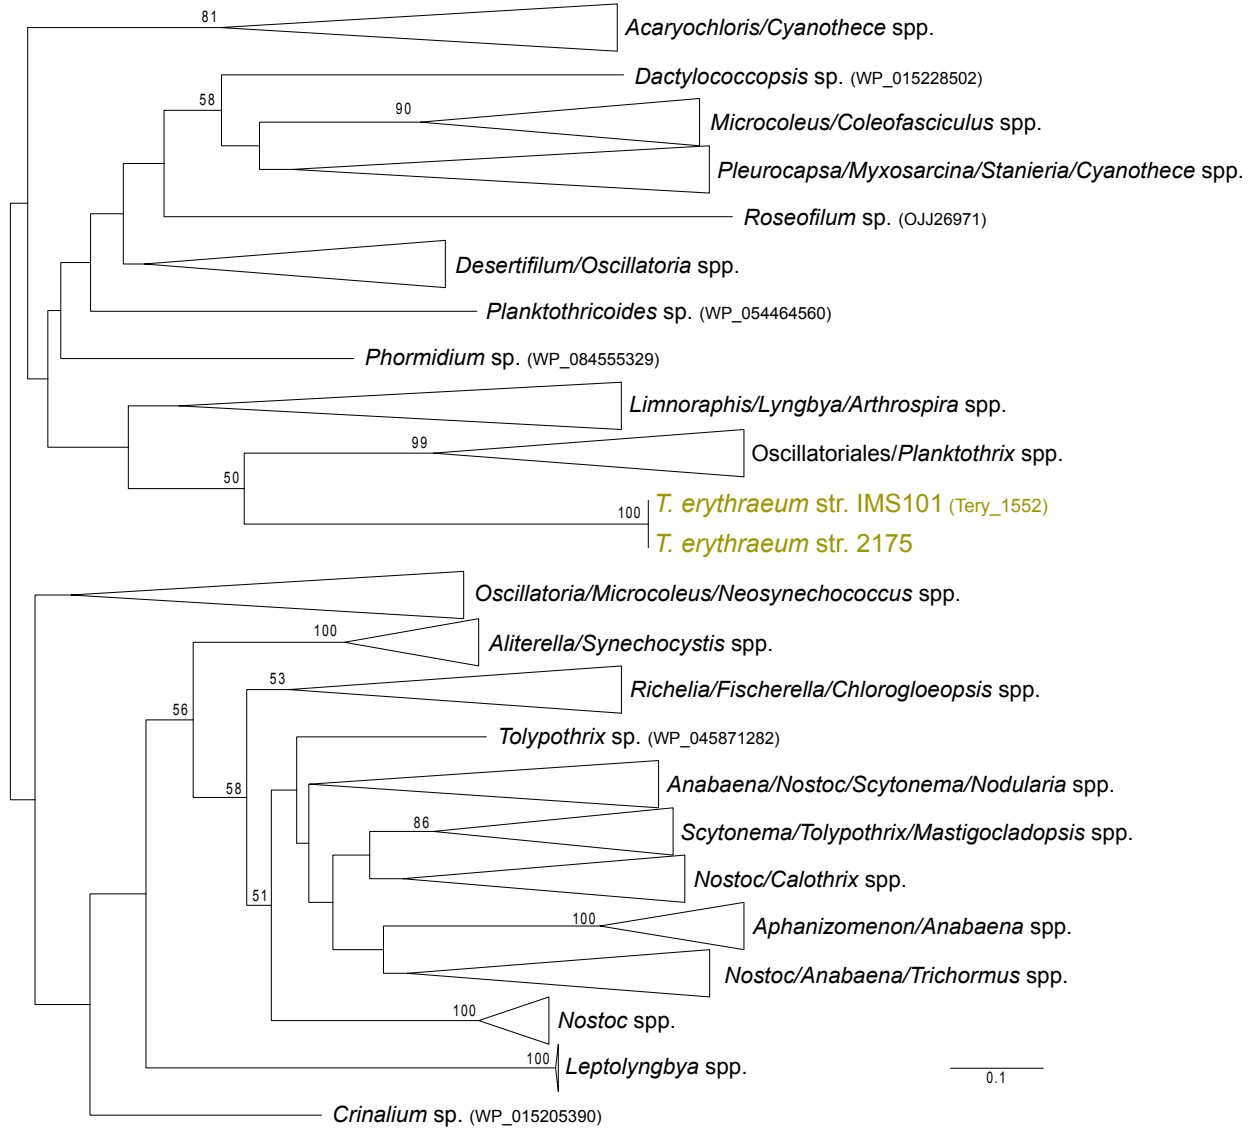

Fig. S3 Maximum likelihood phylogenetic analysis of the *Trichodesmium cbiF* and its closest homologs with 100 bootstraps.

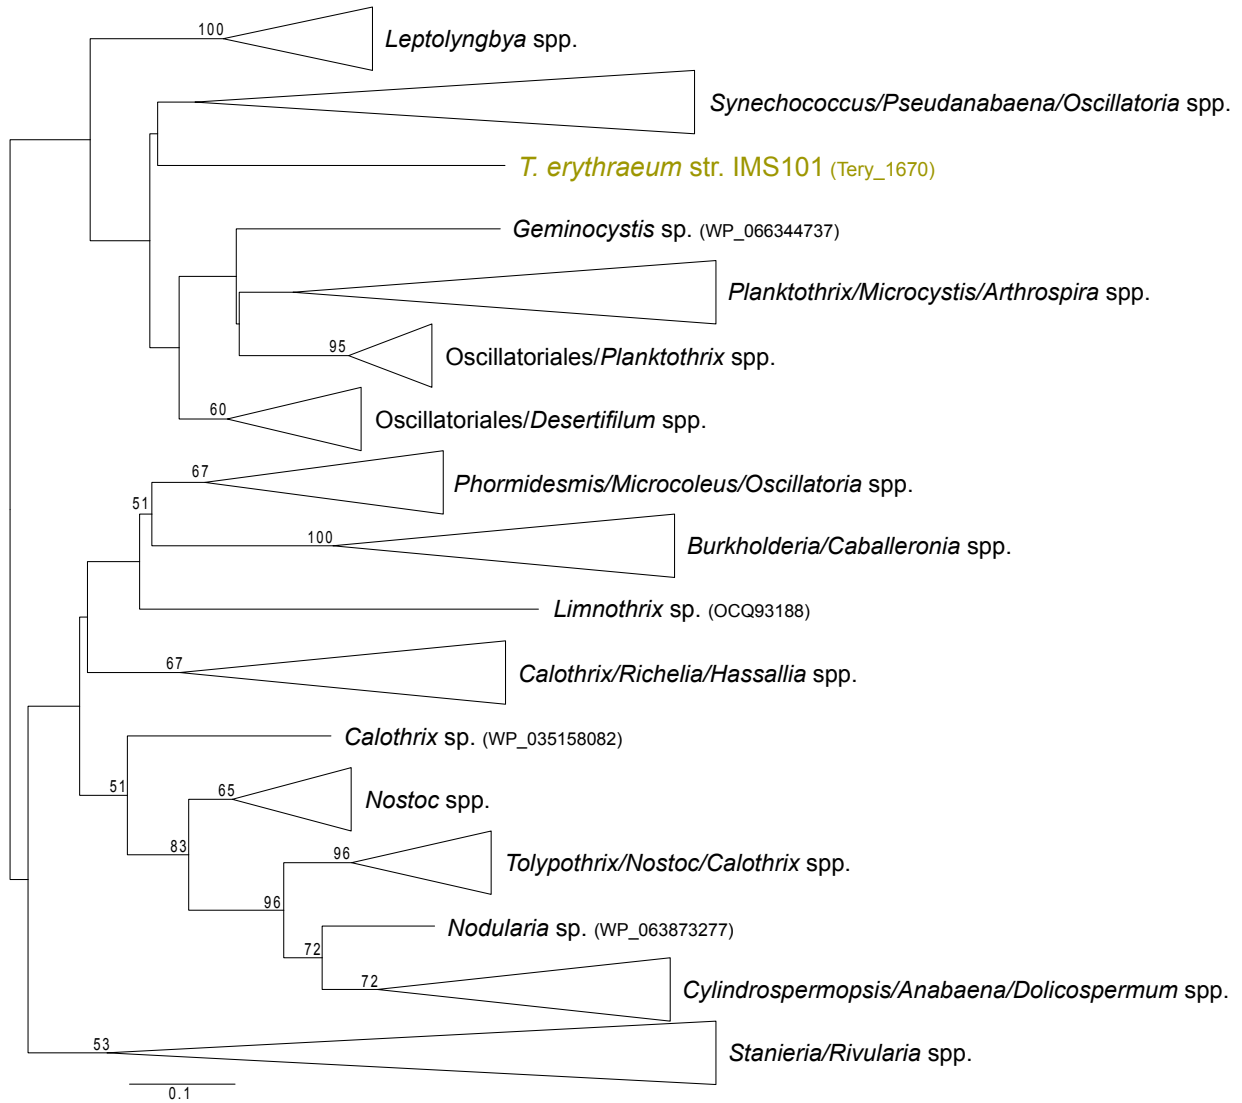

Fig. S4 Maximum likelihood phylogenetic analysis of the *Trichodesmium cbiC* and its closest homologs with 100 bootstraps.

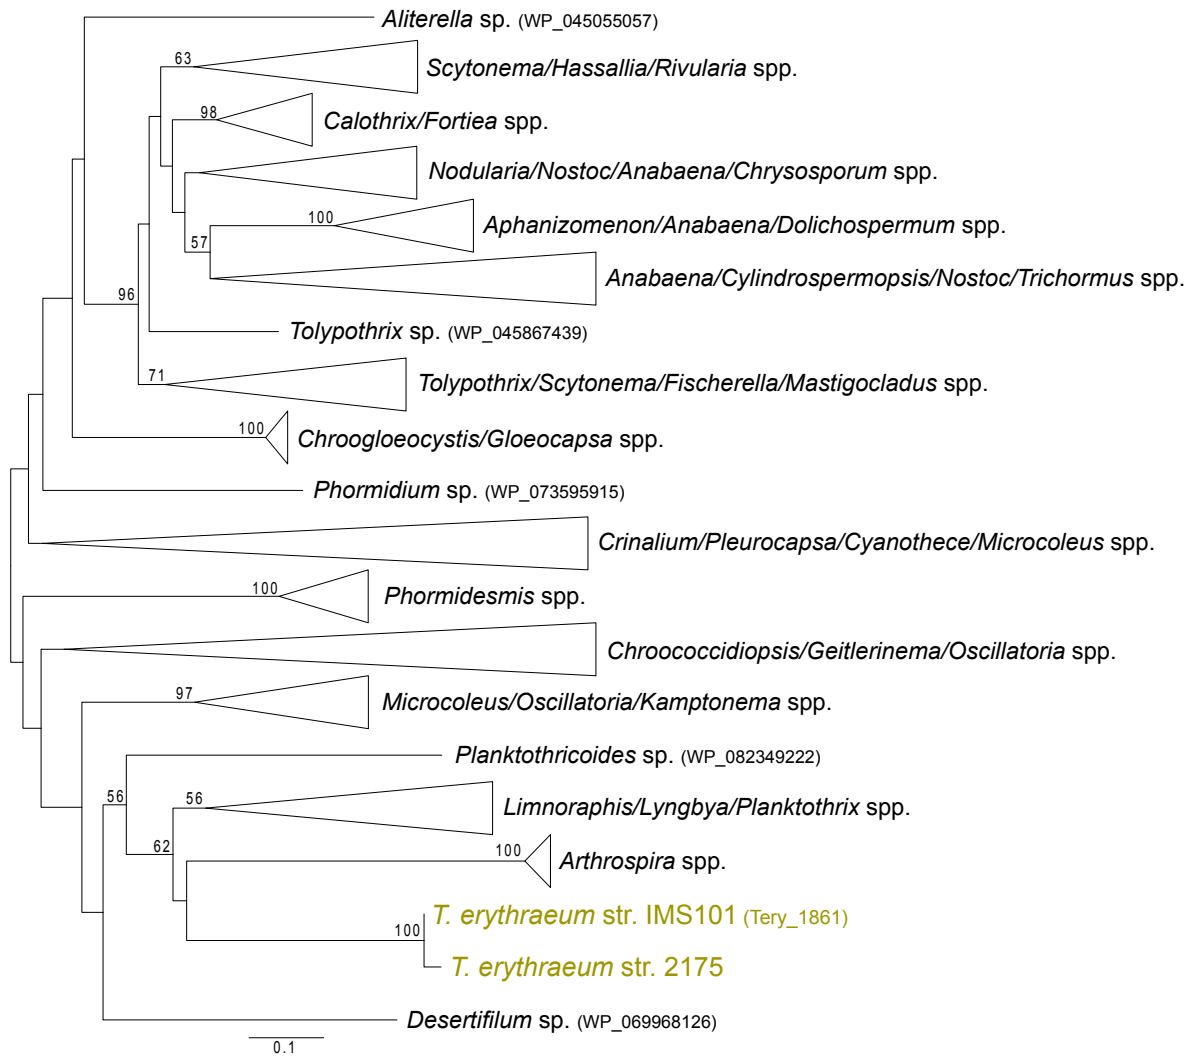

Fig. S5 Maximum likelihood phylogenetic analysis of the *Trichodesmium cobD* and its closest homologs with 100 bootstraps.

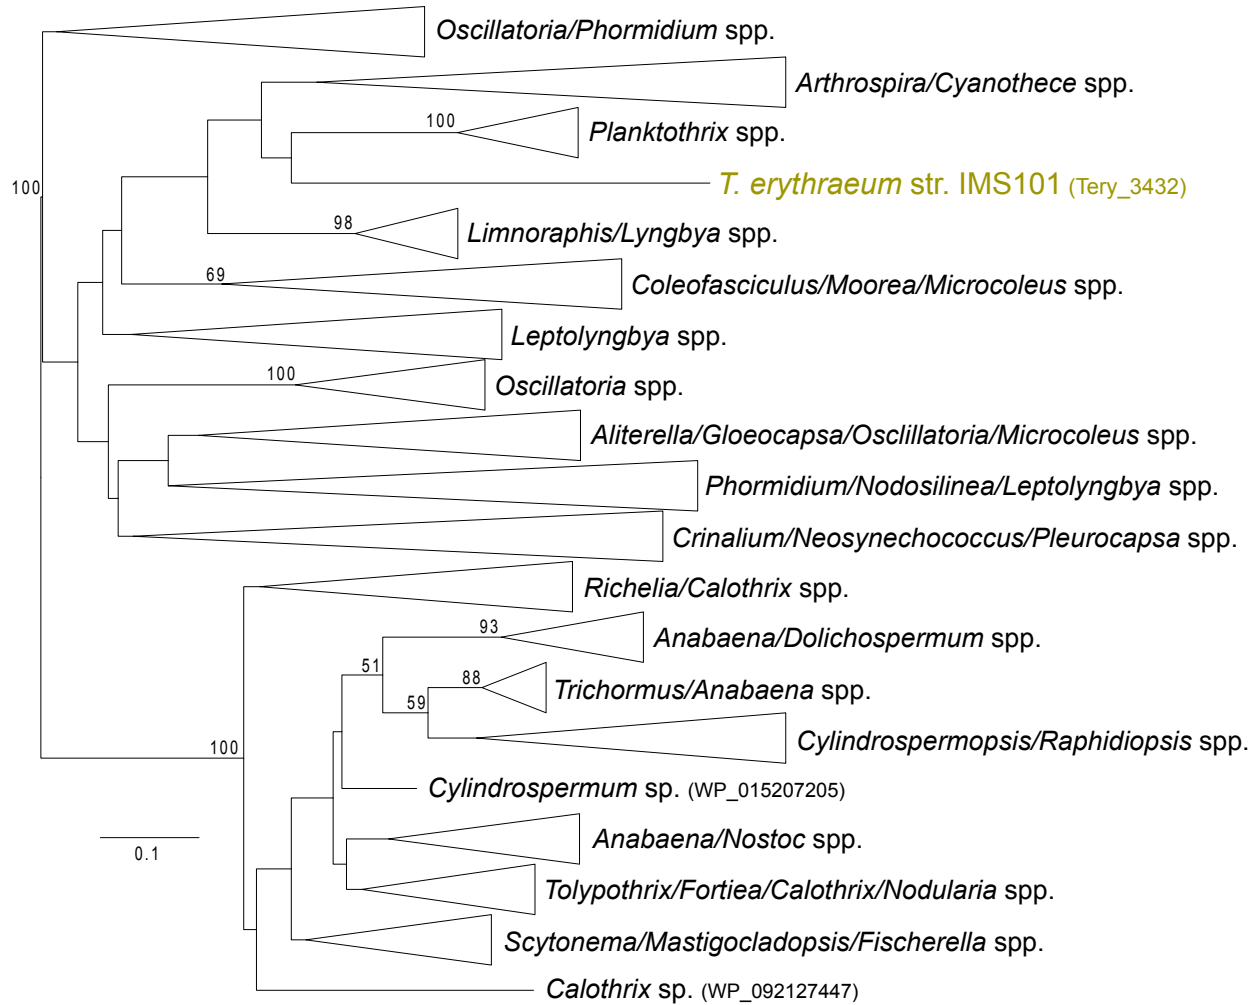

Fig. S6 Maximum likelihood phylogenetic analysis of the *Trichodesmium cobP* and its closest homologs with 100 bootstraps.



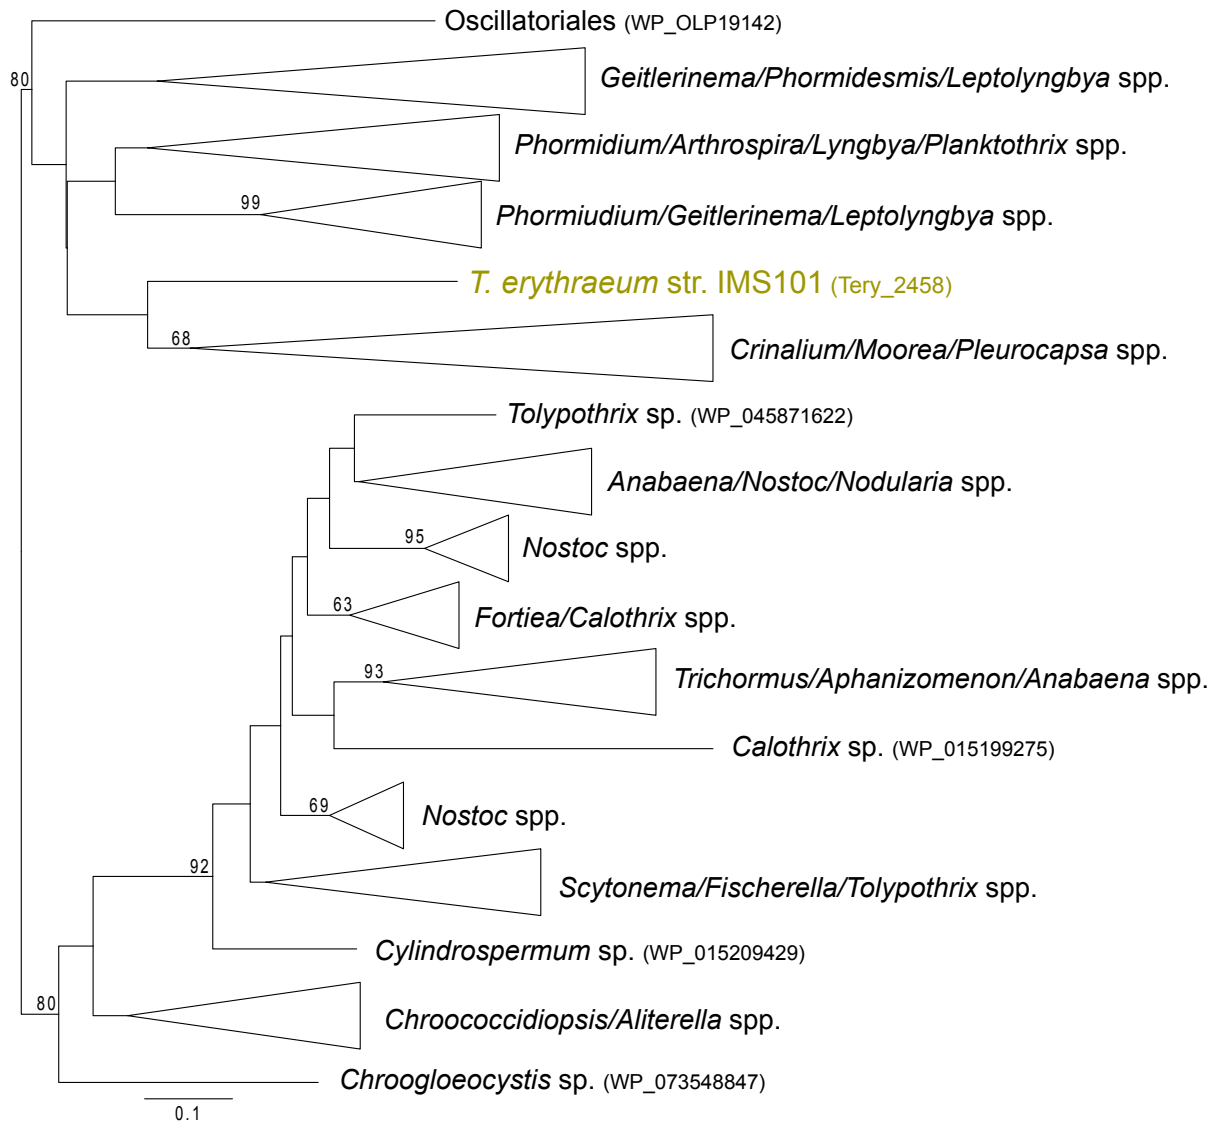

Fig. S7 Maximum likelihood phylogenetic analysis of the *Trichodesmium cobS* and its closest homologs with 100 bootstraps.

```

Tery_4741      MQYSNQNPKIKTQKILTSTIEKSHLYTEEKLESPLQRPPLLIHGTRDSQGK-----
Tery_4427      MNFVND-----LFMNNYLST-----YFLVSHGSRDPRPKLELQTLA
                *:: *::                               *:: *:: *::           *::**:*:*.. *

Tery_4741      -----ETFLDFVAAYQNLDKSRPVIPCFLELTKPTIQEGVDKCEQ---GYTELSALP
Tery_4427      NLLSKQTTLISKYFRQHNNILRYPMITTGVLELGPPLHEQIEDFWQSIRALHISQIQIIP
                *:: ..::  ::*:: .   : . .***   .::* ::.   :.   :::: :*

Tery_4741      ILLFAARHNKFDITNELDRARQR-----HPQVKFYGRH
Tery_4427      LFLLPGVHVTEDIPAEIQIFRERVKANATSKIVLHEEKSHLKLEKKLEINIPIKVNLYPY
                ::*::.. * . ** . *::: *:*                               : :*.   :

Tery_4741      FGITPKIIEIWRSLKELDKTNFNSSETVLLFVGRGSSDPDANGDVYKLARMLWEG----
Tery_4427      IGSHPKMVNLLATKMTSVIAEAW-----VIISHGSRRTESNEVVEKISQFLSSSCKVL
                :*  **:::*  :::::  :   ::::..**  .::*  * *:::.*  ..

Tery_4741      --SGYLTVETCFIGITHPRLEEGFRRARLYQPKRIMVLPYFLFTGVLVKKIFDITAQQQE
Tery_4427      VCTAYWSVPPDLKSRVDILMKQGY-----KKIGILPYFLFNGGITDAIADTVNQLSQ
                :.* :* . : . .   ::*::   *.* :*****.* :.. * * . * .:

Tery_4741      QYPDISMTCLEI GAHPTLLELLREREIETQLGEVKMNCEMCKFRLVTVTNREHSHGSH
Tery_4427      IYPTIQFHMTTPLGPTEELACLVAD-----LVS-----SSQ-----
                ** *.: . :*. * *:::                               **:   *:*

Tery_4741      HYHDHSHSLNIPESHSHSVVDPYAEPEKYHQRIWQVP
Tery_4427      -----

```

Fig. S8 Multiple sequence alignment of the two CbiX copies from Fig. S2. The metal-binding **MXCXC** motif is denoted in grey in Tery\_4741 and is absent in Tery\_4427.

## Supplementary Data

**Table S1:** These are the TMM-normalized (Robinson and Oshlack, 2010) expression levels of B<sub>12</sub> biosynthesis/salvage genes that were sampled midday from the *Trichodesmium* long-term experiment (Walworth et al., 2017). R1 and R2 stand for biological replicate 1 and 2 of the r380 treatment in Walworth et al. 2017 in which cells were grown in nutrient-replete, Aquil medium in 380 ppm CO<sub>2</sub>.

|                  |      | <b>R1</b>   | <b>R2</b>   |
|------------------|------|-------------|-------------|
| <b>Tery_4461</b> | bluB | 11.7559833  | 9.87497621  |
| <b>Tery_0786</b> | btuR | 43.16650118 | 36.25242944 |
| <b>Tery_0517</b> | cbiA | 15.82334359 | 19.06511067 |
| <b>Tery_1861</b> | cbiB | 98.79749358 | 113.6174556 |
| <b>Tery_1670</b> | cbiC | 8.633300236 | 7.312342563 |
| <b>Tery_0905</b> | cbiD | 19.05099079 | 14.6467768  |
| <b>Tery_0210</b> | cbiE | 45.23954288 | 39.65454653 |
| <b>Tery_1552</b> | cbiF | 43.6388398  | 43.29967197 |
| <b>Tery_4366</b> | cbiG | 51.90476555 | 58.36619049 |
| <b>Tery_1175</b> | cbiH | 20.41552457 | 24.89731138 |
| <b>Tery_0768</b> | cbiL | 18.00134943 | 19.06511067 |
| <b>Tery_2739</b> | cbiJ | 39.33531019 | 48.15983924 |
| <b>Tery_3957</b> | cbiP | 57.73027513 | 67.71096663 |
| <b>Tery_1288</b> | cbiT | 36.55376057 | 34.59555424 |
| <b>Tery_4741</b> | cbiX | 99.24359116 | 113.7058223 |
| <b>Tery_4427</b> | cbiX | 17.26660047 | 18.4686356  |
| <b>Tery_2181</b> | cobC | 507.5803236 | 478.8369337 |
| <b>Tery_2458</b> | cobS | 14.66873809 | 15.61881025 |
| <b>Tery_3432</b> | cobU | 27.36939862 | 28.82962853 |
| <b>Tery_3325</b> | cysG | 29.20627101 | 27.96805343 |
| <b>Tery_1666</b> | isiB | 1098.948269 | 1002.69669  |
| <b>Tery_2088</b> | btuR | 571.2481888 | 585.3839262 |
| <b>Tery_4685</b> | btuR | 155.9785573 | 126.5139721 |

**Table S2:** These are the normalized spectral counts of B<sub>12</sub> biosynthesis/salvage proteins that were sampled midday from the *Trichodesmium* long-term experiment (Walworth et al., 2016). R1, R2, and R3 stand for biological replicate 1, 2, and 3 of the r380 treatment in Walworth et al. 2016 in which cells were grown in nutrient-replete, Aquil medium in 380 ppm CO<sub>2</sub>.

| <b>Id</b>        |      | <b>R1</b> | <b>R2</b> | <b>R3</b> |
|------------------|------|-----------|-----------|-----------|
| <b>Tery_3325</b> | CysG | 1.8056    | 2.777     | 1.7974    |
| <b>Tery_2181</b> | CobC | 32.501    | 31.473    | 35.947    |
| <b>Tery_3957</b> | CbiP | 0.9028    | 0.92568   | 0.89868   |
| <b>Tery_4461</b> | BluB | 3.6112    | 3.7027    | 3.5947    |
| <b>Tery_1666</b> | IsiB | 65.905    | 63.872    | 65.604    |
| <b>Tery_0786</b> | BtuR | 3.6112    | 1.8514    | 3.5947    |
| <b>Tery_4366</b> | CbiG | 0.9028    | 1.8514    | 0.89868   |
| <b>Tery_1552</b> | CbiF | 2.7084    | 3.7027    | 2.696     |
| <b>Tery_1288</b> | CbiT | 0.9028    | 1.8514    | 2.696     |
| <b>Tery_2088</b> | BtuR | 6.3196    | 6.4797    | 5.3921    |
| <b>Tery_4685</b> | BtuR | 22.57     | 21.291    | 21.568    |

**Table S3:** These are the TMM-normalized (Robinson and Oshlack, 2010) expression levels of the B<sub>12</sub>-dependent *metH* and *nrdJ* and B<sub>12</sub>-independent *metE* that were sampled midday from the *Trichodesmium* long-term experiment (Walworth et al., 2017). R1 and R2 stand for biological replicate 1 and 2 of the r380 treatment in Walworth et al. 2017 in which cells were grown in nutrient-replete, Aquil medium in 380 ppm CO<sub>2</sub>.

| RNA              |      | <b>R1</b>   | <b>R2</b>   |
|------------------|------|-------------|-------------|
| <b>Tery_0428</b> | nrdJ | 164.8174297 | 149.0907626 |
| <b>Tery_1073</b> | metH | 430.0622843 | 413.826827  |
| <b>Tery_0847</b> | metE | 3971.197808 | 4105.551806 |

**Table S4:** These are the normalized spectral counts of the B<sub>12</sub>-dependent *metH* and *nrdJ* and B<sub>12</sub>-independent *metE* that were sampled midday from the *Trichodesmium* long-term experiment (Walworth et al., 2016). R1, R2, and R3 stand for biological replicate 1, 2, and 3 of the r380 treatment in Walworth et al. 2016 in which cells were grown in nutrient-replete, Aquil medium in 380 ppm CO<sub>2</sub>.

| Protein          |      | <b>R1</b> | <b>R2</b> | <b>R3</b> |
|------------------|------|-----------|-----------|-----------|
| <b>Tery_1073</b> | MetH | 24.376    | 24.993    | 35.049    |
| <b>Tery_0847</b> | MetE | 146.25    | 161.07    | 145.59    |

**Table S5:** These are in transcripts per million for the community only (w/o *Trichodesmium* transcripts). These data are from the *Trichodesmium* consortia metatranscriptome as described in Lee et al. 2017(Lee et al., 2017).

|           | R1    | R2    | Gene symbol        | KO_ID  | Kegg deffinition                          | Blast tax                                                |
|-----------|-------|-------|--------------------|--------|-------------------------------------------|----------------------------------------------------------|
| CDS_44539 | 24.94 | 22.41 | MMAB/pduO/<br>btuR | K00798 | cob(I)alamin<br>adenosyltransferase       | Bacteroidetes<br>(Phaeodactyliba<br>cter<br>xiamenensis) |
| CDS_55643 | 0.09  | 0.11  | MMAB/pduO/<br>btuR | K00798 | cob(I)alamin<br>adenosyltransferase       | Bacteroidetes<br>(Lewinella<br>cohaerens)                |
| CDS_50601 | 0     | 0.83  | MMAB/pduO/<br>btuR | K00798 | cob(I)alamin<br>adenosyltransferase       | Alphaproteobact<br>eria<br>(Ruegeria<br>atlantica)       |
| CDS_71531 | 0     | 0.66  | MMAB/pduO/<br>btuR | K00798 | cob(I)alamin<br>adenosyltransferase       | Synechococcus                                            |
| CDS_17881 | 0.13  | 2.09  | btuR/cobA          | K19221 | cob(I)alamin<br>adenosyltransferase       | Synechococcus                                            |
| CDS_28823 | 0.19  | 0     | btuR/cobA          | K19221 | cob(I)alamin<br>adenosyltransferase       | Synechococcus                                            |
| CDS_35672 | 0     | 1.03  | btuR/cobA          | K19221 | cob(I)alamin<br>adenosyltransferase       | Synechococcus                                            |
| CDS_62206 | 1.05  | 0.16  | btuR/cobA          | K19221 | cob(I)alamin<br>adenosyltransferase       | Synechococcus                                            |
| CDS_51740 | 1.15  | 3.86  | cbiB/cobD          | K02227 | adenosylcobinamide-<br>phosphate synthase | Synechococcus                                            |

## References

- Haas, B. J., Papanicolaou, A., Yassour, M., Grabherr, M., Blood, P. D., Bowden, J., et al. (2013). De novo transcript sequence reconstruction from RNA-seq using the Trinity platform for reference generation and analysis. *Nature Protocols* 8, 1494–1512. doi:10.1038/nprot.2013.084.
- Hyatt, D., LoCascio, P. F., Hauser, L. J., and Uberbacher, E. C. (2012). Gene and translation initiation site prediction in metagenomic sequences. *Bioinformatics* 28, 2223–2230. doi:10.1093/bioinformatics/bts429.
- Kanehisa, M., Sato, Y., Kawashima, M., Furumichi, M., and Tanabe, M. (2016). KEGG as a reference resource for gene and protein annotation. *Nucleic Acids Res* 44, D457–D462. doi:10.1093/nar/gkv1070.
- Kopylova, E., Noé, L., and Touzet, H. (2012). SortMeRNA: fast and accurate filtering of ribosomal RNAs in metatranscriptomic data. *Bioinformatics* 28, 3211–3217. doi:10.1093/bioinformatics/bts611.

- Lee, M. D., Walworth, N. G., McParland, E. L., Fu, F.-X., Mincer, T. J., Levine, N. M., et al. (2017). The *Trichodesmium* consortium: conserved heterotrophic co-occurrence and genomic signatures of potential interactions. *ISME J.* doi:10.1038/ismej.2017.49.
- Robinson, M. D., and Oshlack, A. (2010). A scaling normalization method for differential expression analysis of RNA-seq data. *Genome Biol.* 11, R25. doi:10.1186/gb-2010-11-3-r25.
- Sanudo-Wilhelmy, S., Cutter, L. S., Durazo, R., Smail, E. A., Gomez-Consarnau, L., Webb, E. A., et al. (2012). Multiple B-vitamin depletion in large areas of the coastal ocean. *Proc Natl Acad Sci USA* 109, 14041–14045. doi:10.1073/pnas.1208755109/-/DCSupplemental.
- Walworth, N. G., Fu, F.-X., Lee, M. D., Cai, X., Saito, M. A., Webb, E. A., et al. (2017). Nutrient co-limited *Trichodesmium* as nitrogen source or sink in a future ocean. *Appl. Environ. Microbiol.*, AEM.02137–17–16. doi:10.1128/AEM.02137-17.
- Walworth, N. G., Fu, F.-X., Webb, E. A., Saito, M. A., Moran, D., McIlvin, M. R., et al. (2016). Mechanisms of increased *Trichodesmium* fitness under iron and phosphorus co-limitation in the present and future ocean. *Nat. Commun.* 7, 12081. doi:10.1038/ncomms12081.
